# Supplementary material
Source: Springer Nature journal article supplement (https://www.springermedizin.de/resource/supplementary/12891_2012_1804_MOESM4_ESM.docx/9509074)
Supplement: MOESM4 [file 9509074]

| **ICF second level categories (n=28)** | | (%) |
| --- | --- | --- |
| d445 | Hand and arm use | 24,5 |
| d850 | Remunerative employment | 23,2 |
| d920 | Recreation and leisure | 18,3 |
| d430 | Lifting and carrying objects | 17,1 |
| d510 | Washing oneself | 17 |
| d540 | Dressing | 15,8 |
| d520 | Caring for body parts | 12,7 |
| d640 | Doing housework | 10,4 |
| d415 | Maintaining a body position | 6 |
| d230 | Carrying out daily routine | 4,5 |
| d475 | Driving | 4,7 |
| d530 | Toileting | 3,6 |
| d650 | Caring for household objects | 3,6 |
| d620 | Acquisition of goods and services | 3,4 |
| d470 | Using transportation | 3,6 |
| d760 | Family relationships | 3 |
| d550 | Eating | 2,9 |
| d450 | Walking | 2,8 |
| d410 | Changing basic body position | 2,6 |
| d630 | Preparing meals | 2,6 |
| d750 | Informal social relationships | 2,6 |
| d455 | Moving around | 2,5 |
| d770 | Intimate relationships | 2,3 |
| d859 | Work and employment, other specified and unspecified | 2,2 |
| d170 | Writing | 2,1 |
| d440 | Fine hand use | 2,1 |
| d570 | Looking after one's health | 1,1 |
| d820 | School education | 1 |
